# Supplementary material
Source: PubMed Central journal article supplement (PMC3385979)
Supplement: supp_2.7.731_FigureS1.pdf [file supp_2.7.731_FigureS1.pdf]

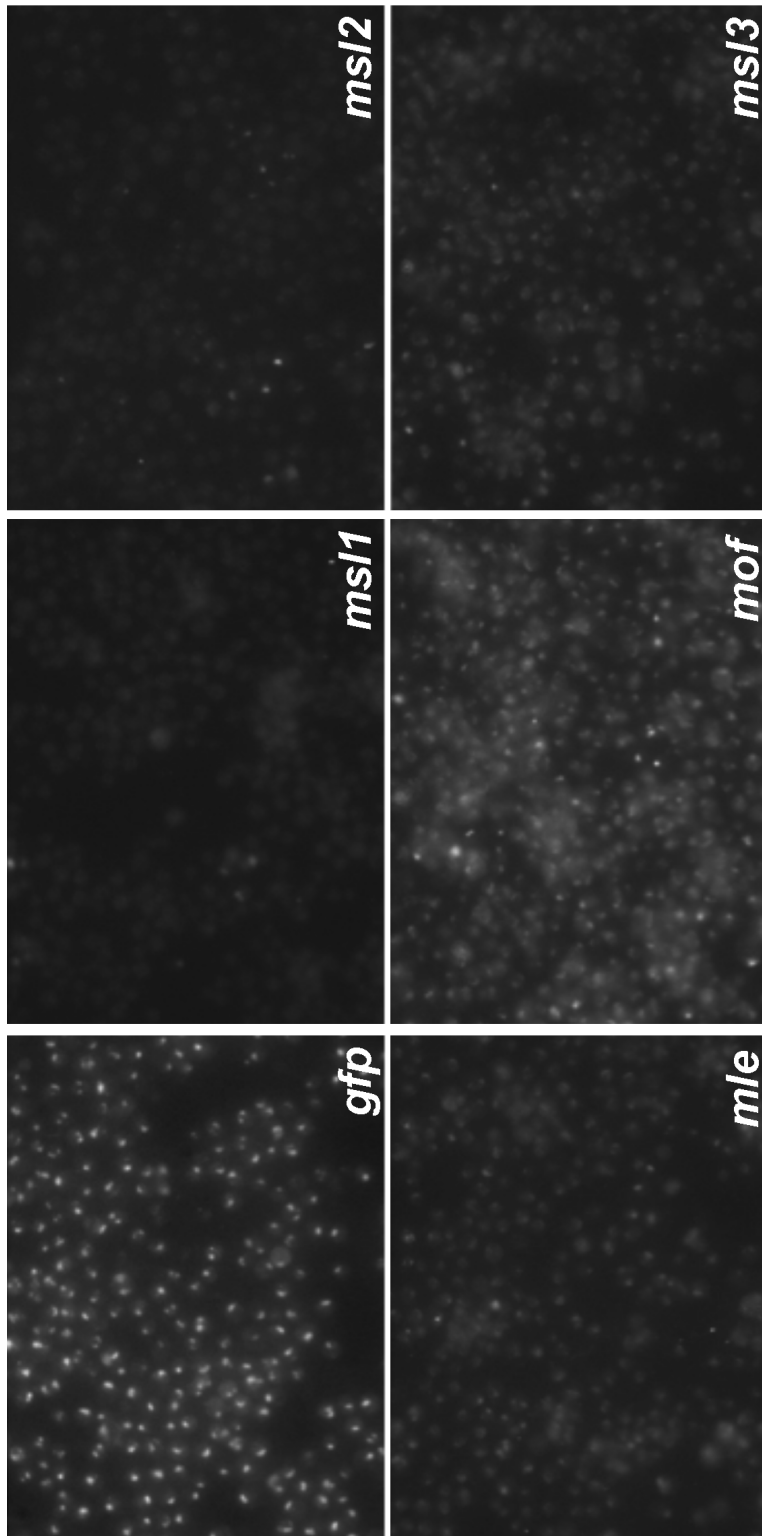

**Figure S1** MSL components identified as “dim” hits. Images show a field of S2 cells stained with anti-MSL1 and treated with dsRNAs targeting *gfp* (negative control) or each of the protein components of the MSL complex.
